# Supplementary material for: A Straightforward Access to New Families of Lipophilic Polyphenols by Using Lipolytic Bacteria
Source: PubMed Central journal article supplement (PMC5113952; doi:10.1371/journal.pone.0166561), 2016-11-17
Supplement: pone.0166561.s003.pdf [file pone.0166561.s003.pdf]

## S1 Supplementary Experimental Procedures.

### 2-(3,4-Dihydroxyphenyl)-2-methoxyethyl acetate (**6a**) from compound **5**

Eluted with CH<sub>2</sub>Cl<sub>2</sub>-MeOH 40:1 → 10:1 gave **6a**, 90% with *Terribacillus* sp. 2B122 and 79% with *Bacillus* sp. HR21-6. <sup>1</sup>H-NMR (300 MHz, CD<sub>3</sub>OD): δ 6.80 (d 1H, *J*<sub>5,6</sub> = 8.0 Hz, Ar-5), 6.79 (d 1H, *J*<sub>2,6</sub> = 2.0 Hz, Ar-2), 6.68 (dd 1H, *J*<sub>6,5</sub> = 8.0 Hz, *J*<sub>6,2</sub> = 2.0 Hz, Ar-6), 4.32 (dd 1H, *J*<sub>2,1a</sub> = 8.0 Hz, *J*<sub>2,1b</sub> = 3.9 Hz, CH), 4.18 and 4.07 (dd 2H each, *J*<sub>1a,1b</sub> = 11.4 Hz, *J*<sub>1a,2</sub> = 8.0 Hz, *J*<sub>1b,2</sub> = 3.9 Hz, CH<sub>2</sub>), 3.25 (s 3H, OMe), 2.06 (s 3H, Ac); <sup>13</sup>C-NMR (75.5 MHz, CD<sub>3</sub>OD): δ 173.6 (CO), (Ar-3 and 4), 131.4 (Ar-1), 120.7 (Ar-6), 117.2 (Ar-5), 115.8 (Ar-2), 83.4 (CH), 69.5 (CH<sub>2</sub>), 57.7 (OMe), 21.6 (Ac); IR (cm<sup>-1</sup>): 1389, 1367, 1235, 1114, 1036. HRCI-MS *m/z*: calcd for C<sub>11</sub>H<sub>14</sub>O<sub>5</sub> ([M]<sup>+</sup>): 226.0841, found 226.0845.

### 2-(3,4-Dihydroxyphenyl)-2-ethoxyethyl acetate (**6b**)

Eluted with CH<sub>2</sub>Cl<sub>2</sub>-EtOH 40:1 gave **6b**, 52% with *Terribacillus* sp. 2B122 and 55% with *Bacillus* sp. HR21-6. <sup>1</sup>H-NMR (300 MHz, CDCl<sub>3</sub>): δ 6.89 (d 1H, *J*<sub>2,6</sub> = 2.0 Hz, Ar-2), 6.83 (d 1H, *J*<sub>5,6</sub> = 8.1 Hz, Ar-5), 6.72 (dd 1H, *J*<sub>6,5</sub> = 8.1 Hz, *J*<sub>6,2</sub> = 2.0 Hz, Ar-6), 4.42 (dd 1H, *J*<sub>2,1a</sub> = 6.9 Hz, *J*<sub>2,1b</sub> = 5.0 Hz, CH), 4.20-4.12 (m 2H, CH<sub>2</sub>), 3.43 (cc 2H, *J*<sub>1'a,1'b</sub> = 16.4 Hz, *J*<sub>1',2'</sub> = 9.4 Hz, CH<sub>2</sub> (OEt)), 2.06 (s 3H, Ac), 1.17 (t 3H, *J*<sub>2',1'</sub> = 7.0 Hz, CH<sub>3</sub> (OEt)); <sup>13</sup>C-NMR (75.5 MHz, CDCl<sub>3</sub>): δ 172.0 (CO), 144.5 (Ar-4), 144.4 (Ar-3), 131.0 (Ar-1), 119.9 (Ar-6), 115.5 (Ar-5), 113.9 (Ar-2), 79.6 (CH), 68.4 (CH<sub>2</sub>), 64.8 (CH<sub>2</sub> (OEt)), 21.3 (Ac), 15.4 (CH<sub>3</sub> (OEt)); IR (cm<sup>-1</sup>): 3368, 1713, 1232, 1109, 1035; HRCI-MS *m/z*: calcd for C<sub>12</sub>H<sub>16</sub>O<sub>5</sub> ([M]<sup>+</sup>): 240.0998, found 240.0990.

### **2-(3,4-Dihydroxyphenyl)-2-propoxyethyl acetate (6c)**

Eluted with EtOAc-hexane 1:3 → 1:1 gave **6c** 40% with *Terribacillus* sp. 2B122 and 57% with *Bacillus* sp. HR21-6. <sup>1</sup>H-NMR (300 MHz, CDCl<sub>3</sub>): δ 6.90 (d 1H,  $J_{2,6} = 2.0$  Hz, Ar-2), 6.84 (d 1H,  $J_{5,6} = 8.1$  Hz, Ar-5), 6.73 (dd 1H,  $J_{6,5} = 8.1$  Hz,  $J_{6,2} = 2.0$  Hz, Ar-6), 4.41 (dd 1H,  $J_{2,1a} = 7.6$  Hz,  $J_{2,1b} = 4.5$  Hz, CH), 4.21-4.10 (m 2H, CH<sub>2</sub>), 3.40-3.24 (m 2H, OCH<sub>2</sub> (OPr)), 2.06 (s 3H, Ac), 1.59 (sext 2H,  $J = 7.4$  Hz, CH<sub>2</sub> (OPr)), 0.88 (t 3H,  $J = 7.4$  Hz, CH<sub>3</sub> (OPr)); <sup>13</sup>C-NMR (75.5 MHz, CDCl<sub>3</sub>): δ 171.9 (CO), 144.4 (Ar-4), 144.3 (Ar-3), 131.2 (Ar-1), 120.0 (Ar-6), 115.5 (Ar-5), 113.9 (Ar-2), 79.7 (CH), 71.1 (CH<sub>2</sub>), 68.4 (OCH<sub>2</sub> (OPr)), 23.1 (CH<sub>2</sub> (OPr)), 21.3 (Ac), 10.8 (CH<sub>3</sub> (OPr)); IR (cm<sup>-1</sup>): 3368, 1714, 1230, 1109, 1003; HRCI-MS  $m/z$ : calcd for C<sub>13</sub>H<sub>18</sub>O<sub>5</sub> ([M]<sup>+</sup>): 254.1154, found 254.1148.

### **2-Butoxy-2-(3,4-dihydroxyphenyl)ethyl acetate (6d)**

Eluted with EtOAc-hexane 1:2 gave **6d**, 44% with *Terribacillus* sp. 2B122 and 61% with *Bacillus* sp. HR21-6. <sup>1</sup>H-NMR (300 MHz, CDCl<sub>3</sub>): δ 6.90 (d 1H,  $J_{2,6} = 1.9$  Hz, Ar-2), 6.84 (d 1H,  $J_{5,6} = 8.0$  Hz, Ar-5), 6.73 (dd 1H,  $J_{6,5} = 8.0$  Hz,  $J_{6,2} = 1.9$  Hz, Ar-6), 6.50 (s 1H, OH), 5.95 (s 1H, OH), 4.44 (dd 1H,  $J_{2,1a} = 7.7$  Hz,  $J_{2,1b} = 4.4$  Hz, CH), 4.22-4.10 (m 2H, CH<sub>2</sub>), 3.45-3.28 (m 2H, OCH<sub>2</sub>CH<sub>2</sub>CH<sub>2</sub>CH<sub>3</sub>), 2.07 (s 3H, Ac), 1.55 (c 2H,  $J = 6.6$  Hz, OCH<sub>2</sub>CH<sub>2</sub>CH<sub>2</sub>CH<sub>3</sub>), 1.39-1.25 (m 2H, OCH<sub>2</sub>CH<sub>2</sub>CH<sub>2</sub>CH<sub>3</sub>), 0.86 (t 3H,  $J = 7.3$  Hz, OCH<sub>2</sub>CH<sub>2</sub>CH<sub>2</sub>CH<sub>3</sub>); <sup>13</sup>C-NMR (75.5 MHz, CDCl<sub>3</sub>): δ 172.1 (CO), 144.4 (Ar-4), 144.3 (Ar-3), 131.1 (Ar-1), 120.0 (Ar-6), 115.5 (Ar-5), 113.9 (Ar-2), 79.7 (CH), 69.2 (OCH<sub>2</sub>CH<sub>2</sub>CH<sub>2</sub>CH<sub>3</sub>), 68.4 (CH<sub>2</sub>), 32.0 (OCH<sub>2</sub>CH<sub>2</sub>CH<sub>2</sub>CH<sub>3</sub>), 21.3 (Ac), 19.6 (OCH<sub>2</sub>CH<sub>2</sub>CH<sub>2</sub>CH<sub>3</sub>), 14.2 (OCH<sub>2</sub>CH<sub>2</sub>CH<sub>2</sub>CH<sub>3</sub>); IR (cm<sup>-1</sup>): 3361, 2960, 1711, 1232, 1036; HRCI-MS  $m/z$ : calcd for C<sub>14</sub>H<sub>20</sub>O<sub>6</sub> ([M]<sup>+</sup>): 268.1311, found 268.1320.

### 2-(3,4-Dihydroxyphenyl)-2-methoxyethanol (7a)

Eluted with CH<sub>2</sub>Cl<sub>2</sub>-MeOH 1:0 → 1:20 gave **7a**, 65%. <sup>1</sup>H-NMR (300 MHz, D<sub>2</sub>O): δ 6.94 (d 1H, *J*<sub>5,6</sub> = 8.1 Hz, Ar-5), 6.89 (d 1H, *J*<sub>2,6</sub> = 2.0 Hz, Ar-2), 6.80 (dd 1H, *J*<sub>6,5</sub> = 8.1 Hz, *J*<sub>6,2</sub> = 2.0 Hz, Ar-6), 4.80 (s 3H, OH), 4.29 (dd 1H, *J*<sub>1',2'a</sub> = 7.5 Hz, *J*<sub>1',2'b</sub> = 4.6 Hz, CH), 3.71 and 3.64 (2 dd 1H each, *J*<sub>2'a,2'b</sub> = 11.9 Hz, *J*<sub>2'a,1'</sub> = 7.5 Hz, *J*<sub>2'b,1'</sub> = 4.6 Hz, CH<sub>2</sub>), 3.27 (s 3H, OMe); <sup>13</sup>C-NMR (75.5 MHz, D<sub>2</sub>O): δ 144.1 (Ar-1), 144.0 (Ar-2), 130.5 (Ar-4), 119.8 (Ar-5), 116.1 (Ar-6), 114.7 (Ar-3), 83.6 (CH), 65.0 (CH<sub>2</sub>), 56.0 (OMe); IR (cm<sup>-1</sup>): 3315, 1520, 1281, 1198, 1104, 1064, 1029; HRCI-MS *m/z*: calcd for C<sub>9</sub>H<sub>12</sub>O<sub>4</sub> ([M]<sup>+</sup>): 184.0736, found 184.0735.

### 2-(3,4-Dihydroxyphenyl)-2-ethoxyethanol (7b)

Eluted with CH<sub>2</sub>Cl<sub>2</sub>-EtOH 1:0 → 1:10 gave **7b**, 62%. <sup>1</sup>H-NMR (300 MHz, CD<sub>3</sub>OD): δ 6.91 (d 1H, *J*<sub>5,6</sub> = 8.1 Hz, Ar-5), 6.88 (d 1H, *J*<sub>2,6</sub> = 1.8 Hz, Ar-2), 6.80 (dd 1H, *J*<sub>6,5</sub> = 8.1 Hz, *J*<sub>6,2</sub> = 2.0 Hz, Ar-6), 4.84 (s 3H, OH), 4.38 (dd 1H, *J*<sub>1',2'a</sub> = 7.7 Hz, *J*<sub>1',2'b</sub> = 4.4 Hz, CH), 3.70 and 3.61 (2 dd 1H each, *J*<sub>2'a,2'b</sub> = 11.7 Hz, *J*<sub>2'a,1'</sub> = 8.0 Hz, *J*<sub>2'b,1'</sub> = 4.4 Hz, CH<sub>2</sub>), 3.48 (c 2H, *J* = 6.9 Hz, CH<sub>2</sub> (OEt)), 1.19 (t 3H, *J* = 7.1 Hz, CH<sub>3</sub> (OEt)); <sup>13</sup>C-NMR (75.5 MHz, CD<sub>3</sub>OD): δ 146.1 (Ar-4), 145.9 (Ar-3), 133.1 (Ar-1), 121.3 (Ar-6), 117.7 (Ar-5), 116.3 (Ar-2), 83.9 (CH), 67.3 (CH<sub>2</sub>), 66.3 (CH<sub>2</sub> (OEt)), 16.1 (CH<sub>3</sub> (OEt)); IR (cm<sup>-1</sup>): 3347, 1280, 1092, 1082; HRCI-MS *m/z*: calcd for C<sub>10</sub>H<sub>14</sub>O<sub>4</sub> ([M]<sup>+</sup>): 199.0970, found 199.0972.

### 2-(3,4-Dihydroxyphenyl)-2-propoxyethanol (7c)

Eluted with EtOAc-hexane 1:1 gave **7c**, 31%. <sup>1</sup>H-NMR (300 MHz, CD<sub>3</sub>OD): δ 6.78 (d 1H, *J*<sub>2,6</sub> = 1.9 Hz, Ar-2), 6.76 (d 1H, *J*<sub>5,6</sub> = 8.0 Hz, Ar-5), 6.65 (dd 1H, *J*<sub>6,5</sub> = 8.0 Hz, *J*<sub>6,2</sub> = 2.0 Hz, Ar-6), 4.86 (s 3H, OH), 4.22 (dd 1H, *J*<sub>1',2'a</sub> = 8.0 Hz, *J*<sub>1',2'b</sub> = 4.1 Hz, CH), 3.64

and 3.51 (2 dd 1H each,  $J_{2'a,2'b} = 11.6$  Hz,  $J_{2'a,1'} = 8.0$  Hz,  $J_{2'b,1'} = 4.1$  Hz, CH<sub>2</sub>), 3.37-3.29 (m 2H, CH<sub>2</sub> (OPr)), 1.61 (s 2H,  $J = 7.2$  Hz, CH<sub>2</sub> (OPr)), 0.93 (t 3H,  $J = 7.4$  Hz, CH<sub>3</sub> (OPr)); <sup>13</sup>C-NMR (75.5 MHz, CD<sub>3</sub>OD): δ 147.3 (Ar-4), 146.9 (Ar-3), 133.3 (Ar-1), 120.6 (Ar-6), 117.0 (Ar-5), 115.8 (Ar-2), 85.2 (CH), 72.5 (CH<sub>2</sub>), 68.9 (OCH<sub>2</sub> (OPr)), 24.9 (CH<sub>2</sub> (OPr)), 11.8 (CH<sub>3</sub> (OPr)); IR (cm<sup>-1</sup>): 3338, 2928, 1281, 1101, 1021; HRCl-MS  $m/z$ : calcd for C<sub>11</sub>H<sub>16</sub>O<sub>4</sub>Na ([M + Na]<sup>+</sup>): 235.0941, found 235.0939.

### 2-Butoxy-2-(3,4-dihydroxyphenyl)ethanol (7d)

Eluted with EtOAc-hexane 1:1 gave **7d**, 43%. <sup>1</sup>H-NMR (300 MHz, CDCl<sub>3</sub>): δ 6.84 (d 1H,  $J_{2,6} = 1.8$  Hz, Ar-2), 6.83 (d 1H,  $J_{5,6} = 8.0$  Hz, Ar-5), 6.72 (dd 1H,  $J_{6,5} = 8.0$  Hz,  $J_{6,2} = 1.8$  Hz, Ar-6), 6.04 (s 3H, OH), 4.29 (dd 1H,  $J_{2,1a} = 7.8$  Hz,  $J_{2,1b} = 4.4$  Hz, CH), 3.69-3.57 (m 2H, CH<sub>2</sub>), 3.47-3.28 (m 2H, OCH<sub>2</sub>CH<sub>2</sub>CH<sub>2</sub>CH<sub>3</sub>), 1.60-1.51 (m 2H, OCH<sub>2</sub>CH<sub>2</sub>CH<sub>2</sub>CH<sub>3</sub>), 1.43-1.26 (m 2H, OCH<sub>2</sub>CH<sub>2</sub>CH<sub>2</sub>CH<sub>3</sub>), 0.88 (t 3H,  $J = 7.3$  Hz, OCH<sub>2</sub>CH<sub>2</sub>CH<sub>2</sub>CH<sub>3</sub>); <sup>13</sup>C-NMR (75.5 MHz, CDCl<sub>3</sub>): δ 144.3 (Ar-4), 144.2 (Ar-3), 131.8 (Ar-1), 119.9 (Ar-6), 115.7 (Ar-5), 114.1 (Ar-2), 82.5 (CH), 69.2 (OCH<sub>2</sub>CH<sub>2</sub>CH<sub>2</sub>CH<sub>3</sub>), 67.6 (CH<sub>2</sub>), 32.2 (OCH<sub>2</sub>CH<sub>2</sub>CH<sub>2</sub>CH<sub>3</sub>), 19.7 (OCH<sub>2</sub>CH<sub>2</sub>CH<sub>2</sub>CH<sub>3</sub>), 14.2 (OCH<sub>2</sub>CH<sub>2</sub>CH<sub>2</sub>CH<sub>3</sub>); IR (cm<sup>-1</sup>): 3317, 2956, 1281, 1098, 1023; HRCl-MS  $m/z$ : calcd for C<sub>12</sub>H<sub>18</sub>O<sub>4</sub>Na ([M + Na]<sup>+</sup>): 249.1097, found 249.1087.

### Spectroscopic data for crude reaction depicted in Scheme 4

<sup>1</sup>H-NMR (700 MHz, CDCl<sub>3</sub>): δ 7.11 (m, 2H, H-5', H-6' **13**), 7.06 (m, 1H, H-2' **13**), 7.02 (d, 1H,  $J = 8.3$  Hz, H-5' **14**), 7.01 (d, 1H,  $J = 8.2$  Hz, H-5' **11**), 6.99 (dd, 1H,  $J = 8.2$  Hz,  $J = 2.1$  Hz, H-6' **12**), 6.98 (dd,  $J = 8.2$  Hz,  $J = 2.1$  Hz, H-6' **15**), 6.96 (d, 1H,  $J = 2.1$  Hz, H-2' **12**), 6.95 (d, 1H,  $J = 2.1$  Hz, H-2' **15**), 6.93 (d, 1H,  $J = 8.3$  Hz, H-5' **12**), 6.92 (d, 1H,  $J = 8.3$  Hz, H-5' **15**), 6.87 (d, 1H,  $J = 2.1$  Hz, H-2' **11**), 6.86 (d, 1H,  $J = 2.1$  Hz, H-2' **14**), 6.80 (d, 1H,  $J = 8.3$  Hz, H-5' **3**), 6.79 (dd,  $J = 8.2$  Hz,  $J = 2.1$  Hz, H-6' **14**), 6.78 (d, 1H,  $J = 8.3$  Hz, H-5' **1**), 6.77 (dd,  $J = 8.2$  Hz,  $J = 2.1$  Hz, H-6' **11**), 6.74 (d, 1H,  $J = 2.1$

Hz, H-2' **1**), 6.73 (d, 1H,  $J = 2.1$  Hz, H-2' **3**), 6.64 (dd,  $J = 8.2$  Hz,  $J = 2.1$  Hz, H-6' **1**), 6.62 (dd,  $J = 8.2$  Hz,  $J = 2.1$  Hz, H-6' **3**), 4.26, 4.24 (2t, 2H each,  $J = 7.1$  Hz, H-1 **14**, **15**), 4.22 (t, 2H,  $J = 7.1$  Hz, H-1 **3**), 3.86 (t, 2H,  $J = 7.1$  Hz, H-1 **13**), 3.84 (t, 2H,  $J = 7.1$  Hz, H-1 **11**), 3.82 (t, 2H,  $J = 7.1$  Hz, H-1 **12**), 3.81 (t, 2H,  $J = 7.1$  Hz, H-1 **1**), 2.92 (t, 2H,  $J = 7.1$  Hz, H-2 **13**), 2.87 (t, 2H,  $J = 7.1$  Hz, H-2 **14**), 2.85 (t, 2H,  $J = 7.1$  Hz, H-2 **15**), 2.81 (t, 2H,  $J = 7.1$  Hz, H-2 **3**), 2.80 (t, 2H,  $J = 7.1$  Hz, H-2 **11**), 2.79 (t, 2H,  $J = 7.1$  Hz, H-2 **12**), 2.75 (t, 2H,  $J = 7.1$  Hz, H-2 **1**), 2.35, 2.34, 2.28 (4s, 3H each, ArOCOMe **11-15**), 2.04, 2.03 (3s, 3H each, OCOMe **3**, **14**, **15**).

$^{13}\text{C}$ -NMR (175 MHz,  $\text{CDCl}_3$ ):  $\delta$  170.4, 169.8, 169.6, 169.5, 169.4, 168.7, 168.6, 168.4 (OCOMe **1**, **3**, **11-15**), 146.1 (C-3' **11**), 146.0 (C-3' **14**), 144.8 (C-4' **15**), 144.7 (C-4' **12**), 143.0 (C-3' **1**), 142.9 (C-3' **3**), 141.6 (C-4' **1**), 141.5 (C-4' **3**), 137.7 (C-3' **12**), 136.9 (C-1' **11**), 136.8 (C-1' **15**), 136.3 (C-4' **11**), 136.1 (C-4' **14**), 130.6 (C-1' **12**), 130.3 (C-1' **1**), 129.7 (C-1' **3**), 126.7 (C-6' **12**), 126.5 (C-6' **15**), 126.4 (C-5' **15**), 123.1 (C-2' **13**), 122.5 (C-5', C-6' **13**), 122.0 (C-2' **12**), 121.9 (C-2' **15**), 121.6 (C-5' **11**), 121.5 (C-5' **14**), 120.6 (C-6' **11**), 120.3, 120.2 (C-6' **1**, **3**), 117.4 (C-2' **11**), 117.3 (C-2' **14**), 117.0 (C-5' **12**), 116.9 (C-6' **15**), 115.2, 115.0 (C-2' **1**, **3**), 114.6 (C-5' **1**), 114.5 (C-5' **3**), 64.3 (C-1 **3**), 63.9, 63.8 (C-1 **14**, **15**), 62.9 (C-1 **1**), 62.7 (C-1 **12**), 62.6 (C-1 **11**), 62.4 (C-1 **13**), 37.7 (C-2 **11**), 37.6, 37.5 (C-2 **15**, **1**), 37.3 (C-2 **12**), 33.7 (C-2 **14** o **15**), 33.6 (C-2 **3**), 33.3 (C-2 **14** o **15**), 28.8 (OCOMe **3**, **14**, **15**), 20.1, 20.0 (ArOCOMe **11-15**).

#### Spectroscopic data for crude reaction depicted in Scheme 5

$^1\text{H}$ -NMR (700 MHz,  $(\text{CD}_3)_2\text{CO}$ ):  $\delta$  7.12 (dd, 1H,  $J = 8.5$  Hz,  $J = 2.3$  Hz, H-6' **20**), 7.08 (d, 1H,  $J = 2.3$  Hz, H-2' **20**), 7.07 (dd, 1H,  $J = 8.5$  Hz,  $J = 2.3$  Hz, H-6' **17**), 7.06 (d, 1H,  $J = 2.3$  Hz, H-2' **16**), 7.04 (dd, 1H,  $J = 2.3$  Hz, H-2' **17**), 7.03 (d, 1H,  $J = 2.3$  Hz, H-2' **19**), 6.98 (d, 1H,  $J = 8.5$  Hz, H-5' **16**), 6.94 (2d, 1H,  $J = 8.5$  Hz, H-5' **19**, **20**), 6.91 (d, 1H,  $J = 8.5$  Hz, H-5' **17**), 6.90 (d, 1H,  $J = 2.3$  Hz, H-2' **18**), 6.88 (dd, 1H,  $J = 8.5$  Hz,  $J = 2.3$  Hz, H-6' **19**), 6.87 (d, 1H,  $J = 2.3$  Hz, H-2' **4**), 6.84 (dd, 1H,  $J = 8.5$  Hz,  $J = 2.3$  Hz, H-6' **16**), 6.78 (d, 1H,  $J = 8.5$  Hz, H-5' **18**), 6.75 (d, 1H,  $J = 8.5$  Hz, H-5' **4**), 6.72 (dd, 1H,  $J = 8.5$  Hz,  $J = 2.3$  Hz, H-6' **18**), 6.68 (dd, 1H,  $J = 8.5$  Hz,  $J = 2.3$  Hz, H-6' **4**), 4.85, 4.84 (2dd, 1H each,  $J = 7.5$  Hz,  $J = 4.0$  Hz, H-2 **19**, **20**), 4.75 (dd, 1H,  $J = 7.5$  Hz,  $J = 4.6$  Hz, H-2 **18**), 4.64, 4.63 (2dd, 1H each,  $J = 7.8$  Hz,  $J = 4.2$  Hz, H-2 **16**, **17**), 4.55 (dd, 1H,  $J = 8.2$  Hz,  $J = 3.9$  Hz, H-2 **4**), 4.16-4.04 (m, 6H, H-1 **18**, **19**, **20**), 3.59-3.46 (m, 6H, H-2

**4, 16, 17**), 2.25, 2.24, 2.23 (3s, 3H each, ArOCOMe **16, 17, 19, 20**), 2.00, 1.99, 1.98 (3s, 3H each, OCOMe **18, 19, 20**).

<sup>13</sup>C-NMR (175 MHz, (CD<sub>3</sub>)<sub>2</sub>CO): δ 171.0, 170.1, 170.0 (OCOMe **18-20**), 169.5, 169.4, 169.4 (ArOCOMe **16, 17, 19, 20**), 149.3 (C-3' **16**), 149.5 (C-3' **19**), 149.3 (C-4' **20**), 148.9 (C-4' **17**), 146.0 (C-3' **18**), 145.9 (C-3' **4**), 145.7 (C-**18**), 145.3 (C-4' **4**), 142.3 (C-4' **16**), 141.3 (C-4' **19**), 139.4 (C-3' **17**), 139.3 (C-3' **20**), 138.9 (C-1' **16**), 138.6 (C-1' **19**), 135.1, 135.0 (C-1' **17, 20**), 134.1 (C-1' **4, 18**), 125.2, 125.1 (C-6' **17, 20**), 123.6 (C-5' **16**), 123.4 (C-5' **19**), 121.9 (C-2' **20**), 121.8 (C-2' **17**), 118.4 (C-6' **18**), 118.3 (C-6' **4**), 118.1 (C-6' **16, 19**), 117.5 (C-5' **20**), 117.3 (C-5' **17**), 116.0 (C-5' **18**), 115.8 (C-5' **4**), 115.7 (C-2' **16**), 115.6 (C-2' **19**), 114.5 (C-2' **18, 4**), 75.1 (C-2 **4**), 74.9, 74.6 (C-2 **16, 17**), 71.9 (C-2 **18**), 71.7, 71.4 (C-2 **19, 20**), 70.1 (C-1 **18**), 69.8 (C-1 **19, 20**), 69.1 (C-1 **4**), 68.9, 68.8 (C-1 **16, 17**), 20.8, 20.7, 20.6, 20.5 (OCOMe **4, 16-20**).

#### Spectroscopic data for crude reaction depicted in Scheme 6

<sup>1</sup>H-NMR (500 MHz, CDCl<sub>3</sub>): δ 7.13 (m, 4H, H-2', H-6' **22, 26**), 7.08 (d, 1H, *J*= 7.4 Hz, H-5' **25**), 7.06 (d, 1H, *J*= 7.4 Hz, H-5' **21**), 7.01 (d, 1H, *J*= 1.9 Hz, H-2' **21**), 7.00 (d, 1H, *J*= 1.9 Hz, H-2' **25**), 6.98 (2d, 1H each, *J*= 7.4 Hz, H-5' **22, 26**), 6.90 (2dd, 1H each, *J*= 7.4 Hz, *J*= 1.9 Hz, H-6' **21, 25**), 6.89 (2d, 1H each, *J*= 1.9 Hz, H-2' **8, 23**), 6.84 (2d, 1H each, *J*= 7.4 Hz, H-5' **8, 23**), 6.80 (2dd, 1H each, *J*= 7.4 Hz, *J*= 1.9 Hz, H-6' **8, 23**), 5.04 (s, 2H, H-1, **25**), 5.02 (2s, 2H, H-1, **26**), 4.98 (s, 2H, H-1 **23**), 4.75 (s, 2H, H-1 **24**), 4.69 (s, 2H, H-1, **8**), 4.63 (s, 2H, H-1 **21**), 4.61 (s, 2H, H-1 **22**), 2.36, 2.35 (2s, 3H each, ArOCOMe **21, 22, 24-26**), 2.08, 2.07 (2s, 3H each, OCOMe **23, 25, 26**).

<sup>13</sup>C-NMR (125 MHz, CDCl<sub>3</sub>): δ 170.8, 170.5, 170.3 (OCOMe **23-26**), 169.5, 169.4, 169.3 (ArOCOMe **21, 22, 24-26**), 147.2 (C-3' **21**), 147.2 (C-3' **25**), 146.8 (C-4' **26**), 146.6 (C-4' **22**), 144.1 (C-3' **23**), 143.8 (C-4' **23**), 140.2 (C-1' **23**), 138.7 (C-3' **22**), 138.0 (C-4' **21**), 134.1 (C-1' **21**), 128.9 (C-1' **22**), 127.5 (C-6' **26**), 125.9 (C-6' **22**), 123.0 (C-2' **26**), 122.7 (C-5' **21, 25**), 121.6 (C-6' **23**), 121.5 (C-2' **22**), 120.9 (C-6' **25**), 119.4 (C-6' **21**), 117.9 (C-5' **22, 26**), 117.7 (C-2' **25**), 116.3 (C-2' **21**), 116.0 (C-2' **23**), 115.4 (C-5' **23**), 66.3 (C-1 **23**), 65.7, 65.4 (C-1 **25, 26**), 64.8 (C-1 **21**), 64.7 (C-1 **22**), 21.2 (OCOMe **23, 25, 26**), 21.1 (ArOCOMe **21, 22, 24-26**).
