# Supplementary material for: A Straightforward Access to New Families of Lipophilic Polyphenols by Using Lipolytic Bacteria
Source: PubMed Central journal article supplement (PMC5113952; doi:10.1371/journal.pone.0166561), 2016-11-17
Supplement: pone.0166561.s004.pdf [file pone.0166561.s004.pdf]

**S1 Table. Selection of lipolytic microorganisms in the primary screening (hydrolytic)**

| <b>Sample</b> | <b>Bacteria</b> | <b>Fungi</b> | <b>Total</b> |
|---------------|-----------------|--------------|--------------|
| <b>HR11</b>   | 3               | 0            | 3            |
| <b>HR12</b>   | 0               | 378          | 378          |
| <b>HR21</b>   | 63              | 15           | 78           |
| <b>Total</b>  | 66              | 393          | 459          |
