# Supplementary material for: A Straightforward Access to New Families of Lipophilic Polyphenols by Using Lipolytic Bacteria
Source: PubMed Central journal article supplement (PMC5113952; doi:10.1371/journal.pone.0166561), 2016-11-17
Supplement: pone.0166561.s005.pdf [file pone.0166561.s005.pdf]

**S2 Table. Absorbance values obtained in the transesterification assay. In red, the isolates selected with absorbance values higher than the highest hydrolysis control**

| Isolate | Abs 410nm | Isolate | Abs 410nm | Isolate | Abs 410nm |
|---------|-----------|---------|-----------|---------|-----------|
| HR21-1  | 0,229     | HR21-23 | 0,271     | HR21-45 | 0,001     |
| HR21-2  | 0,102     | HR21-24 | 0,109     | HR21-46 | 0,023     |
| HR21-3  | 0,289     | HR21-25 | 0,024     | HR21-47 | 0,067     |
| HR21-4  | 0,065     | HR21-26 | 0,145     | HR21-48 | -0,001    |
| HR21-5  | 0,114     | HR21-27 | -0,001    | HR21-49 | 0,023     |
| HR21-6  | 0,233     | HR21-28 | 0,275     | HR21-50 | 0,018     |
| HR21-7  | 0,096     | HR21-29 | 0,292     | HR21-51 | 0,038     |
| HR21-8  | 0,095     | HR21-30 | 0,404     | HR21-52 | 0,152     |
| HR21-9  | 0,088     | HR21-31 | 0,062     | HR21-53 | -0,018    |
| HR21-10 | 0,036     | HR21-32 | 0,061     | HR21-54 | 0,05      |
| HR21-11 | 0,098     | HR21-33 | 0,039     | HR21-55 | -0,062    |
| HR21-12 | 0,14      | HR21-34 | 0,084     | HR21-56 | -0,077    |
| HR21-13 | 0,862     | HR21-35 | -0,001    | HR21-57 | 0,023     |
| HR21-14 | 0,069     | HR21-36 | -0,046    | HR21-58 | 0,113     |
| HR21-15 | 0,077     | HR21-37 | 0,118     | HR21-59 | 0,215     |
| HR21-16 | 0,102     | HR21-38 | 0,001     | HR21-60 | 0,149     |
| HR21-17 | 0,28      | HR21-39 | -0,07     | HR21-61 | 0,114     |
| HR21-18 | 0,258     | HR21-40 | 0,093     | HR21-62 | 0,17      |
| HR21-19 | 0,087     | HR21-41 | 0,065     | HR21-63 | 0,184     |
| HR21-20 | 0,627     | HR21-42 | -0,001    | HR11-64 | 0,317     |
| HR21-21 | 0,109     | HR21-43 | 0,005     | HR11-65 | 0,158     |
| HR21-22 | 0,081     | HR21-44 | 0,001     | HR11-66 | 0,101     |
